# Supplementary material
Source: PubMed Central journal article supplement (PMC5108872)
Supplement: NIHMS823302-supplement-Supplemental_information.pdf [file NIHMS823302-supplement-Supplemental_information.pdf]

## Supplementary Information

### **A cascading activity-based probe sequentially targets E1-E2-E3 ubiquitin enzymes**

Monique P.C. Mulder<sup>1,\*</sup>, Katharina Witting<sup>1,\*</sup>, Ilana Berlin<sup>1,\*</sup>, Jonathan N. Pruneda<sup>2</sup>, Kuen-Phon Wu<sup>3</sup>, Jer-Gung Chang<sup>4</sup>, Remco Merckx<sup>1</sup>, Johanna Bialas<sup>6</sup>, Marcus Groettrup<sup>6</sup>, Alfred C.O. Vertegaal<sup>4</sup>, Brenda A. Schulman<sup>3,5</sup>, David Komander<sup>2</sup>, Jacques Neefjes<sup>1</sup>, Farid El Oualid<sup>1,7,§</sup>, Huib Ovaa<sup>1,§</sup>

- 1) Division of Cell Biology, Netherlands Cancer Institute, Plesmanlaan 121, 1066 CX Amsterdam, The Netherlands
- 2) Division of Protein and Nucleic Acid Chemistry, Medical Research Council Laboratory of Molecular Biology, Francis Crick Avenue, Cambridge, CB2 0QH, United Kingdom
- 3) Department of Structural Biology, St. Jude Children's Research Hospital, 262 Danny Thomas Place, Memphis, TN 38105, USA.
- 4) Department of Molecular Cell Biology, Leiden University Medical Center, Albinusdreef 2, 2333 ZA Leiden, the Netherlands
- 5) Howard Hughes Medical Institute, 262 Danny Thomas Place, Memphis, TN 38105, USA.
- 6) Division of Immunology, Department of Biology, University of Konstanz, D-78457 Konstanz, Germany
- 7) Current address: UbiQ Bio BV, Science Park 408, 1098 XH, Amsterdam, The Netherlands
- \*) Co-first author
- §) To whom correspondence should be addressed: h.ovaa@nki.nl or farideloualid@ubiqbio.com.

## Supplementary Results

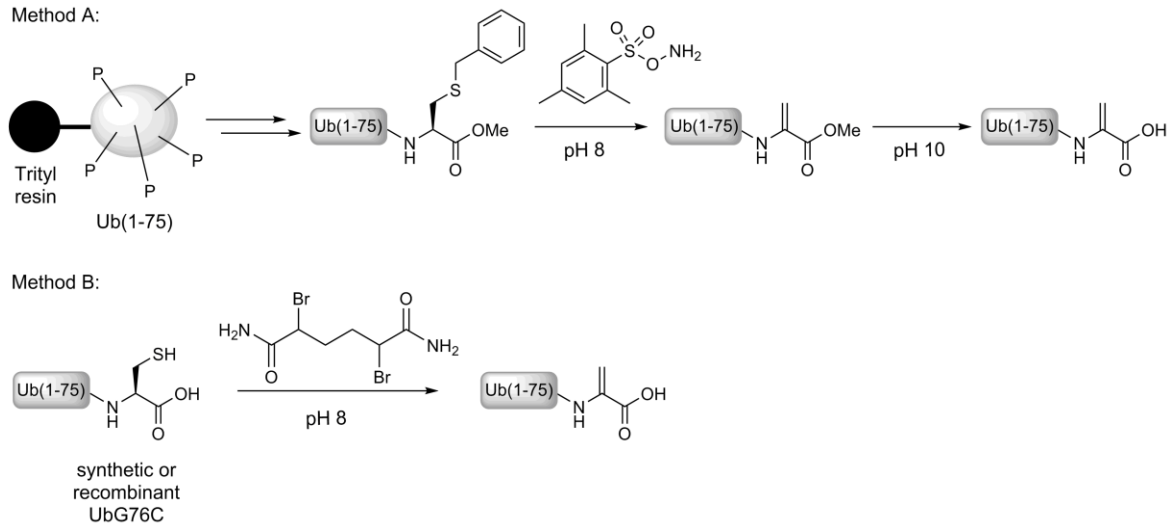

**Supplementary Figure 1.** Synthesis of Ub-Dha starting from Ub(1-75)-Cys(Bn)-OMe (method A) or UbG76C (method B).

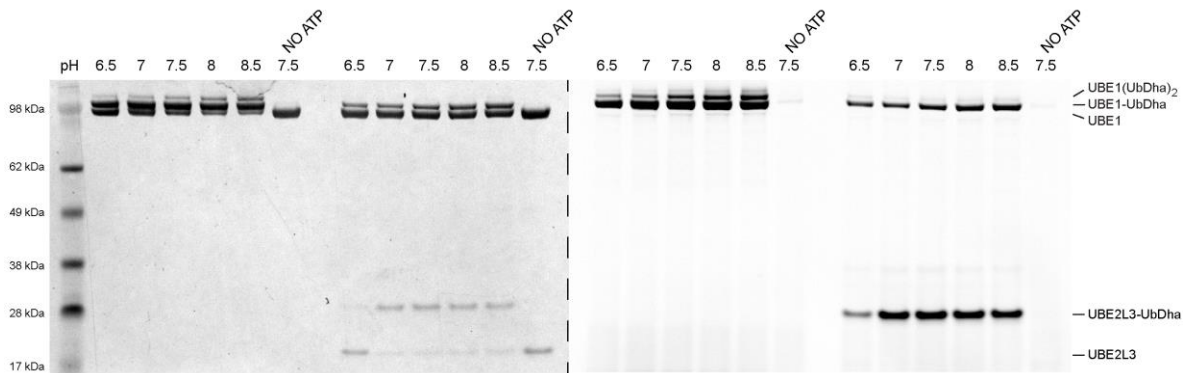

**Supplementary Figure 2.** pH effect on labeling of Cy5-UbDha with UBE1 and UBE2L3. Left: silver stain, right: fluorescent scan.

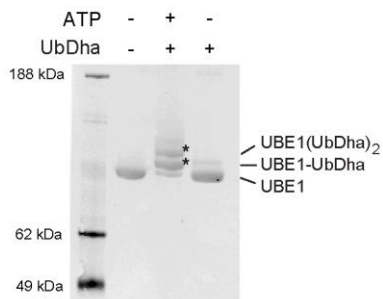

**Supplementary Figure 3.** Western Blot of UBE1 labeling reaction with UbDha (blotted against His-tagged UBE1) showing the UBE1-UbDha and UBE1(UbDha)<sub>2</sub> adducts (indicated by asterisks).

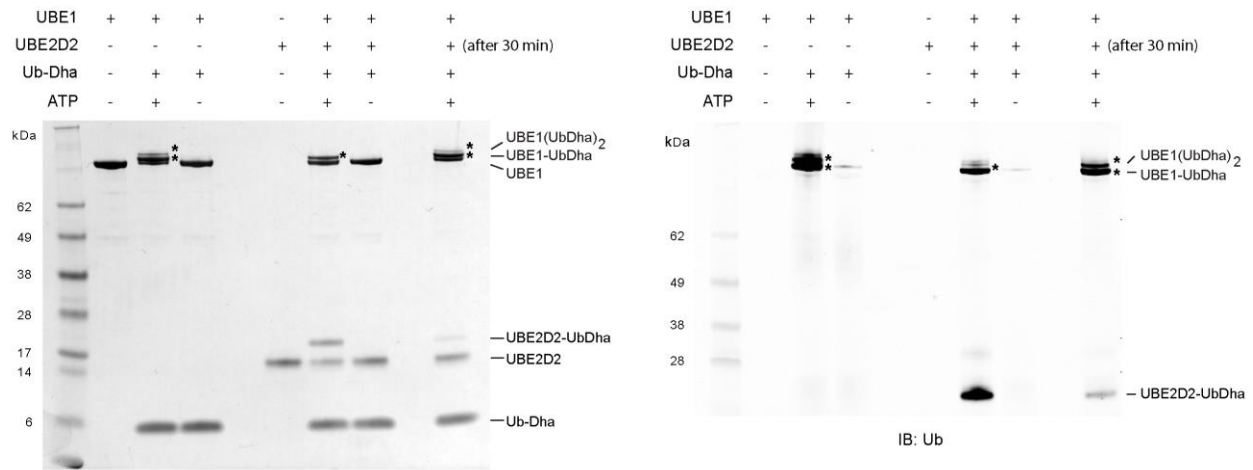

**Supplementary Figure 4.** Doubly loaded UBE1 intermediate is not formed in the presence of UBE2D2. Silver stain (left) and western blot against Ub (right). The asterisks indicate the thioether-linked UBE1-UbDha and UBE1(UbDha)<sub>2</sub> adducts.

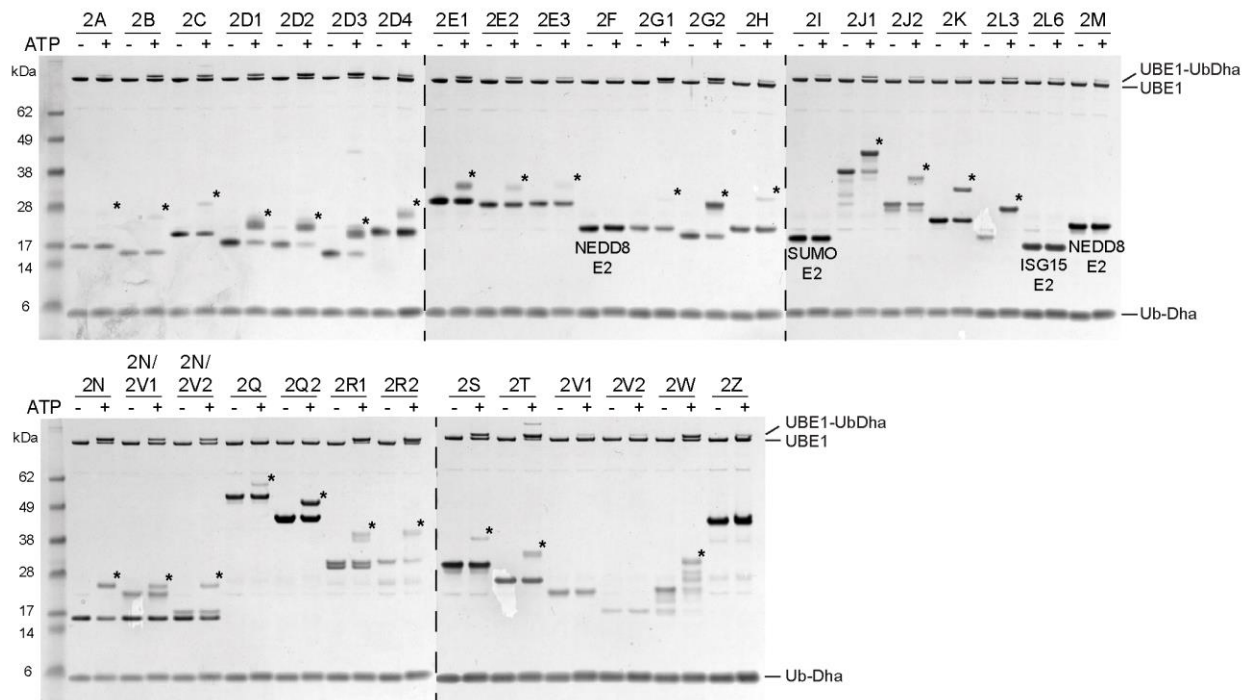

**Supplementary Figure 5.** UbDha labels 27 E2s specific for Ub transfer but not E2s employing Ubls. The asterisks indicate the thioether-linked E2-UbDha adducts. (E2-scan kit, Ubiquigent). Visualized by silver stain.

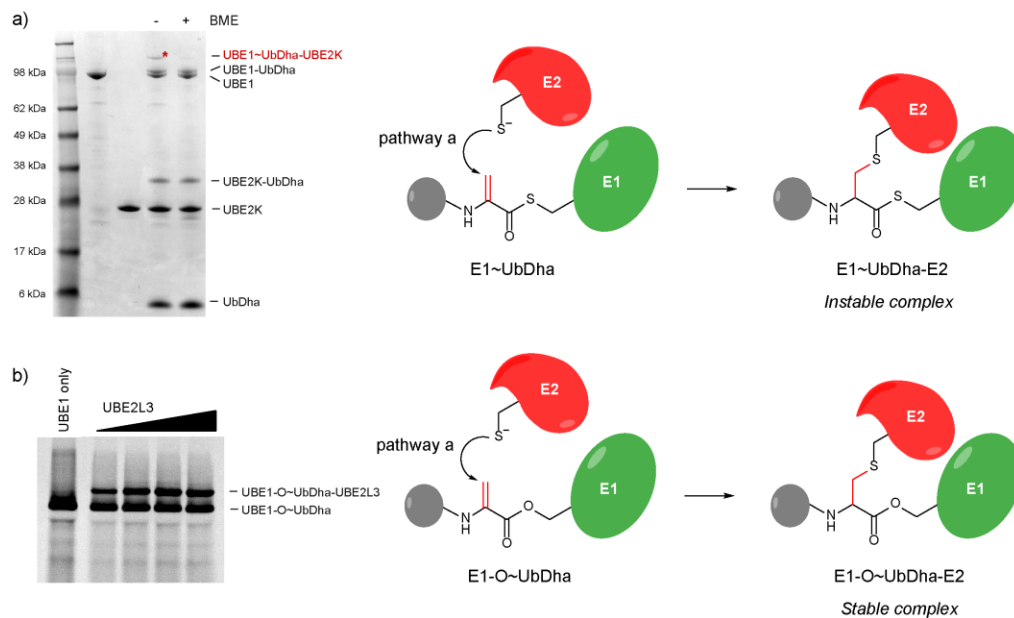

**Supplementary Figure 6.** A ternary complex is formed via a third pathway. The acceptor enzyme directly reacts with the Michael acceptor on the probe donating enzyme thioester adduct. a) SDS-PAGE analysis of UbDha reaction with UBE1 and UBE2K. Under non-reducing conditions the ternary complex is visible on gel, while under reducing conditions this instable complex is not (visualized by coomassie). b) In gel fluorescence analysis of Cy5-UbDha reaction with UBE1 active site Cys-Ser mutant and UBE2L3. Under reducing conditions the more stable ternary UBE1-O~UbDha-UBE2L3 is still visible.

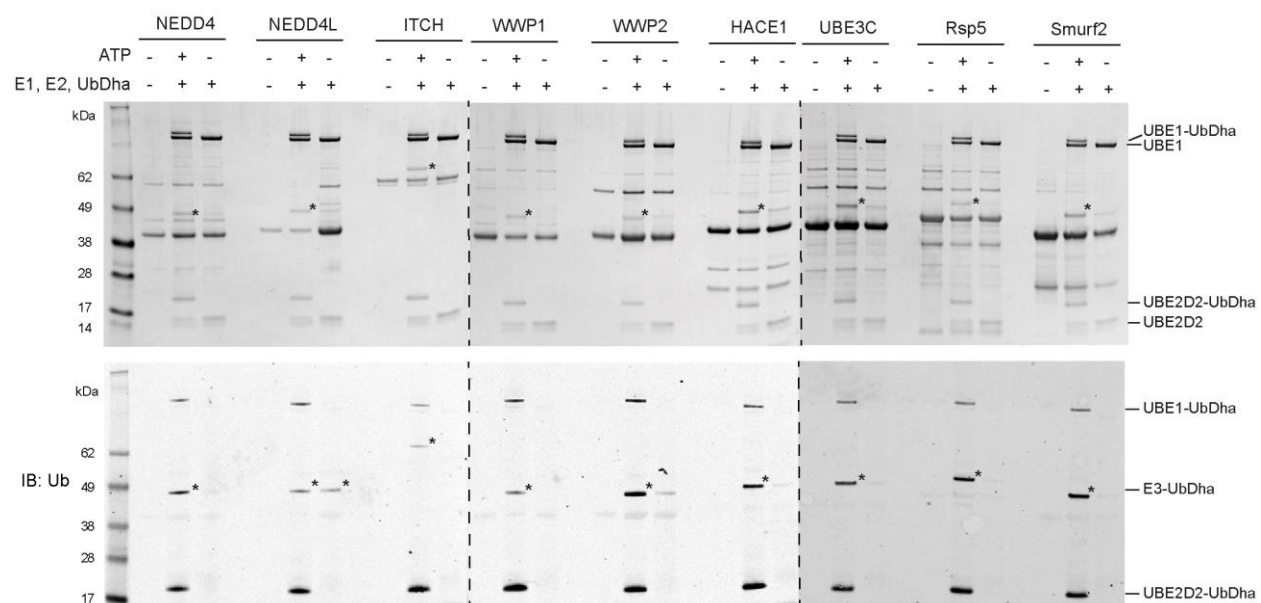

**Supplementary Figure 7.** UbDha shows reactivity towards E3 HECT enzymes under ATP dependent conditions. The asterisks indicate the E3-UbDha thioether-linked adduct. Visualized by silver staining (upper panel) and western blot against Ub (lower panel).

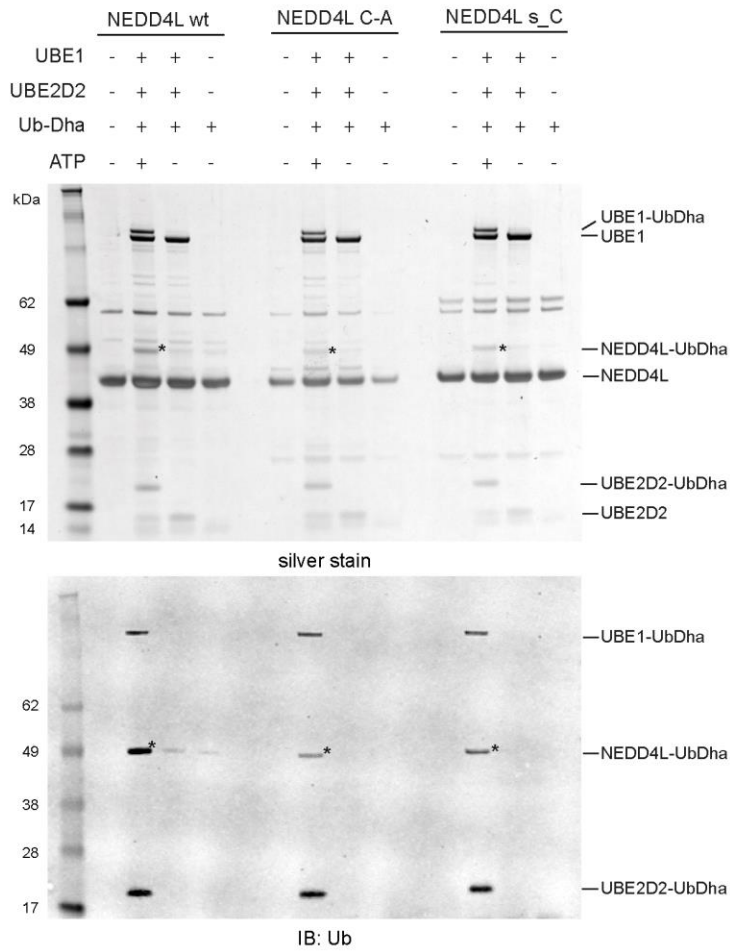

**Supplementary Figure 8.** Labeling of NEDD4L wt, Cys-to-Ala mutant and single Cys mutant with UbDha visualized by silver staining (upper panel) and western blot against Ub (lower panel). The asterisks indicate the thioether-linked NEDD4L-UbDha adduct.

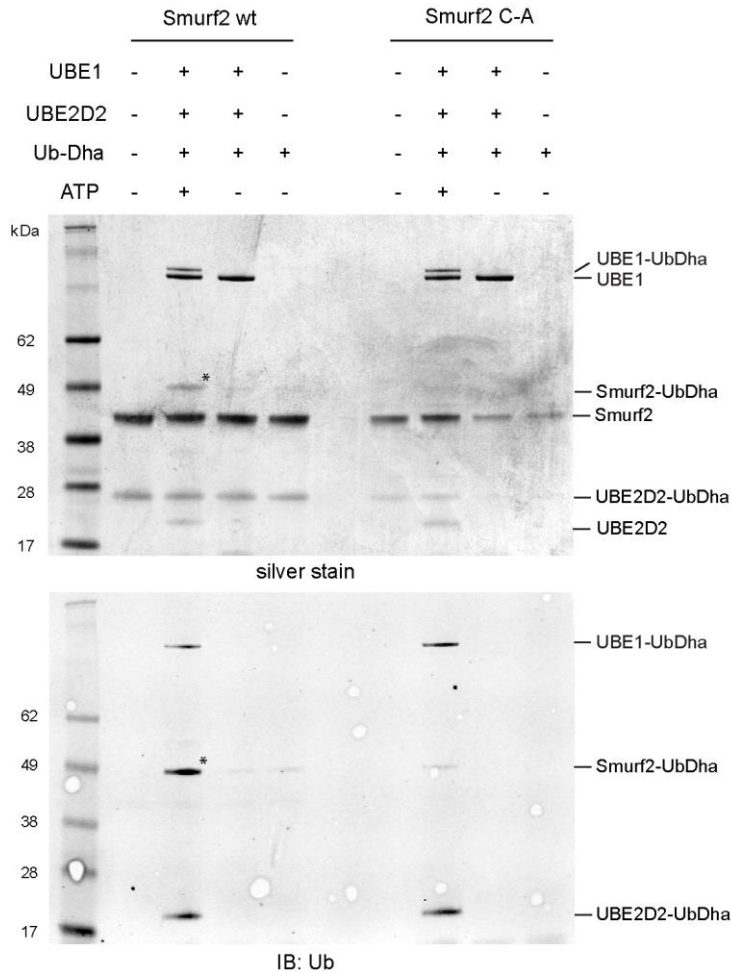

**Supplementary Figure 9.** Labeling of Smurf2 wt and Cys-to-Ala mutant with UbDha, visualized by silver staining (upper panel) and western blot against Ub (lower panel). The asterisks indicate the thioether-linked Smurf2-UbDha adduct.

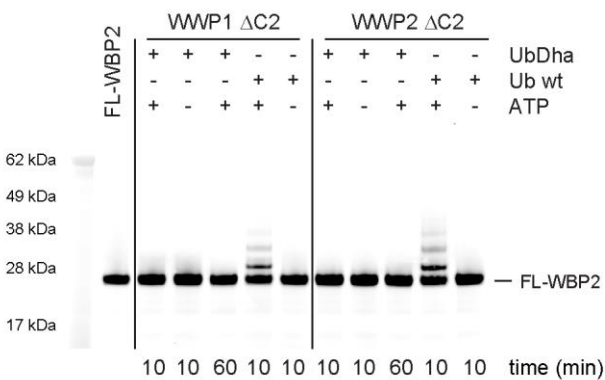

**Supplementary Figure 10.** Multiple turnover ubiquitination on substrate WBP2 does not occur with UbDha.

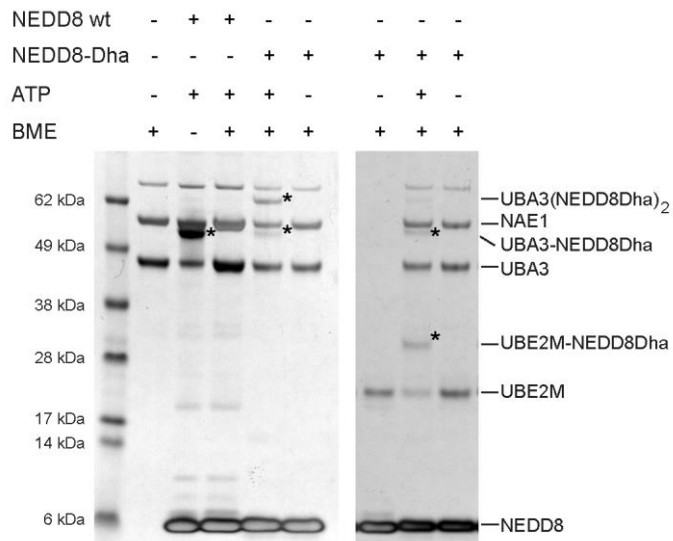

**Supplementary Figure 11.** NEDD8Dha shows covalent bond formation with the E1 UBA3 and E2 UBE2M (visualized by silver stain). Additionally a higher-running E1 band was detected, presumably corresponding to one NEDD8Dha marking the active site Cys and the other bound to the adenylation domain mimicking an E1 double-loaded intermediate (Supplementary Figure 12). The asterisks indicate the labeled enzyme adducts.

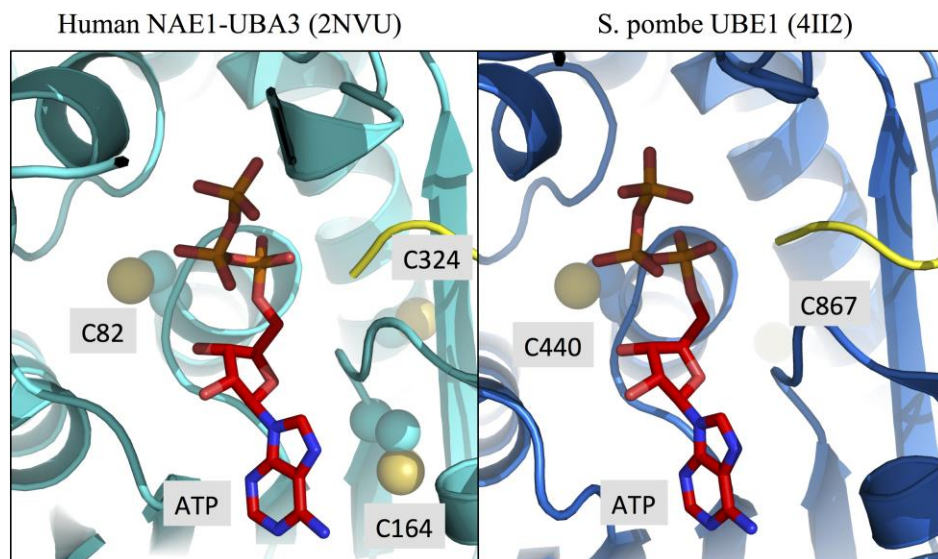

**Supplementary Figure 12.** Aligned E1 structures of the ATP binding site. The ATP binding site of NAE1 is flanked by three cysteines (Cys82, Cys164 and Cys324)<sup>1</sup>, one of these (Cys82) is conserved in human UBE1 (Cys481). Note: There is no human E1 crystal structure available. Therefore we used a yeast UBE1 structure<sup>2</sup>, as a homology model of human UBE1, to present the location of conserved cysteine near ATP (C481 of human UBE1 and C440 of Sp UBE1, human UBE1 and *S. pombe* share 53.8% sequence identity).

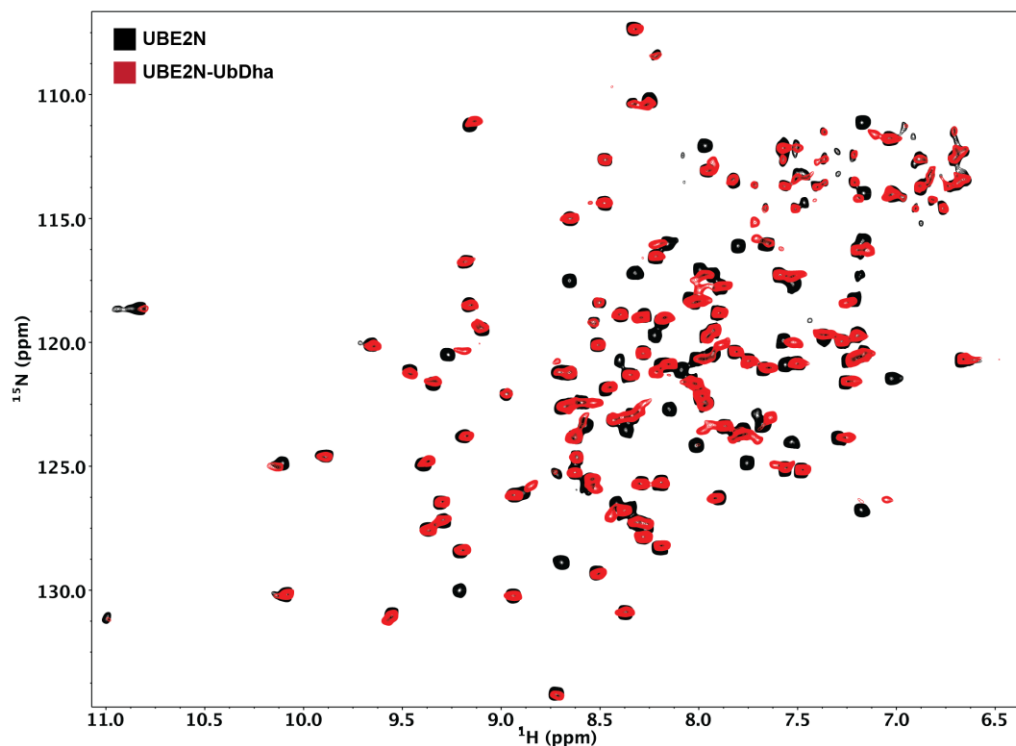

**Supplementary Figure 13:** Full  $^1\text{H}$ ,  $^{15}\text{N}$  HSQC spectra of UBE2N (black) and thioether-linked UBE2N-UbDha (red).

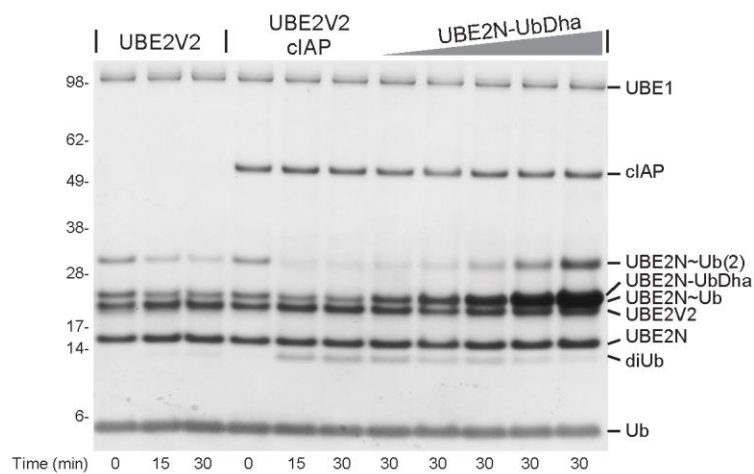

**Supplementary Figure 14.** Thioether-linked UBE2N-UbDha adduct can compete with downstream ubiquitination enzymes. Single-turnover ubiquitination assay monitoring the formation of diUb from thioester-linked UBE2N~Ub. Titration of the stable thioether-linked UBE2N-UbDha into the reaction results in diminished diUb production.



|            |   |     |   |   |    |    |    |    |    |     |     |
|------------|---|-----|---|---|----|----|----|----|----|-----|-----|
| Time (min) | 0 | 0.5 | 1 | 5 | 10 | 30 | 45 | 60 | 90 | 120 | 120 |
| Cy5-UbDha  | - | +   | + | + | +  | +  | +  | +  | +  | +   | +   |
| Apyrase    | - | -   | - | - | -  | -  | -  | -  | -  | -   | +   |

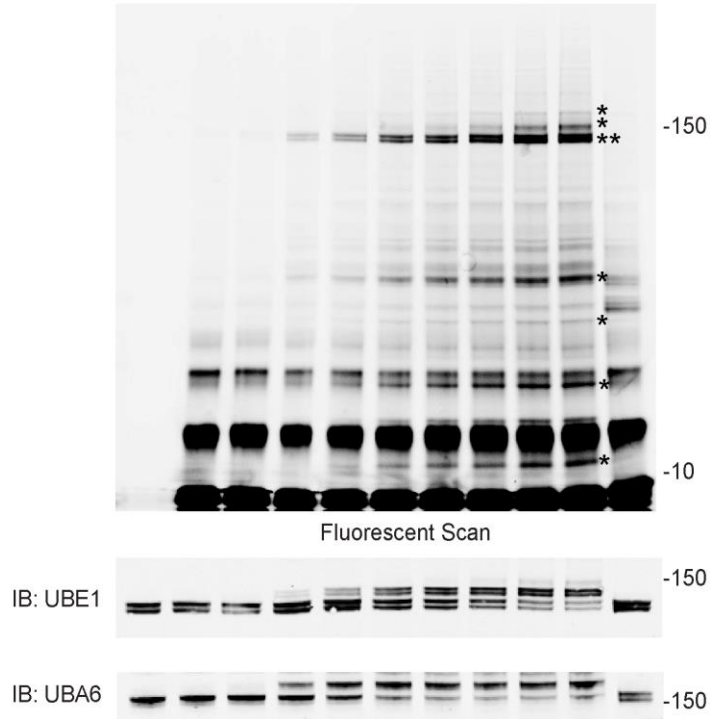

**Supplementary Figure 15.** Activation of UbDha in cell extracts. Time-course of HeLa cell lysates labeling with Cy5UbDha in the absence (-) or presence (+) of ATP scavenger apyrase. The asterisks indicate ATP-dependent bands.



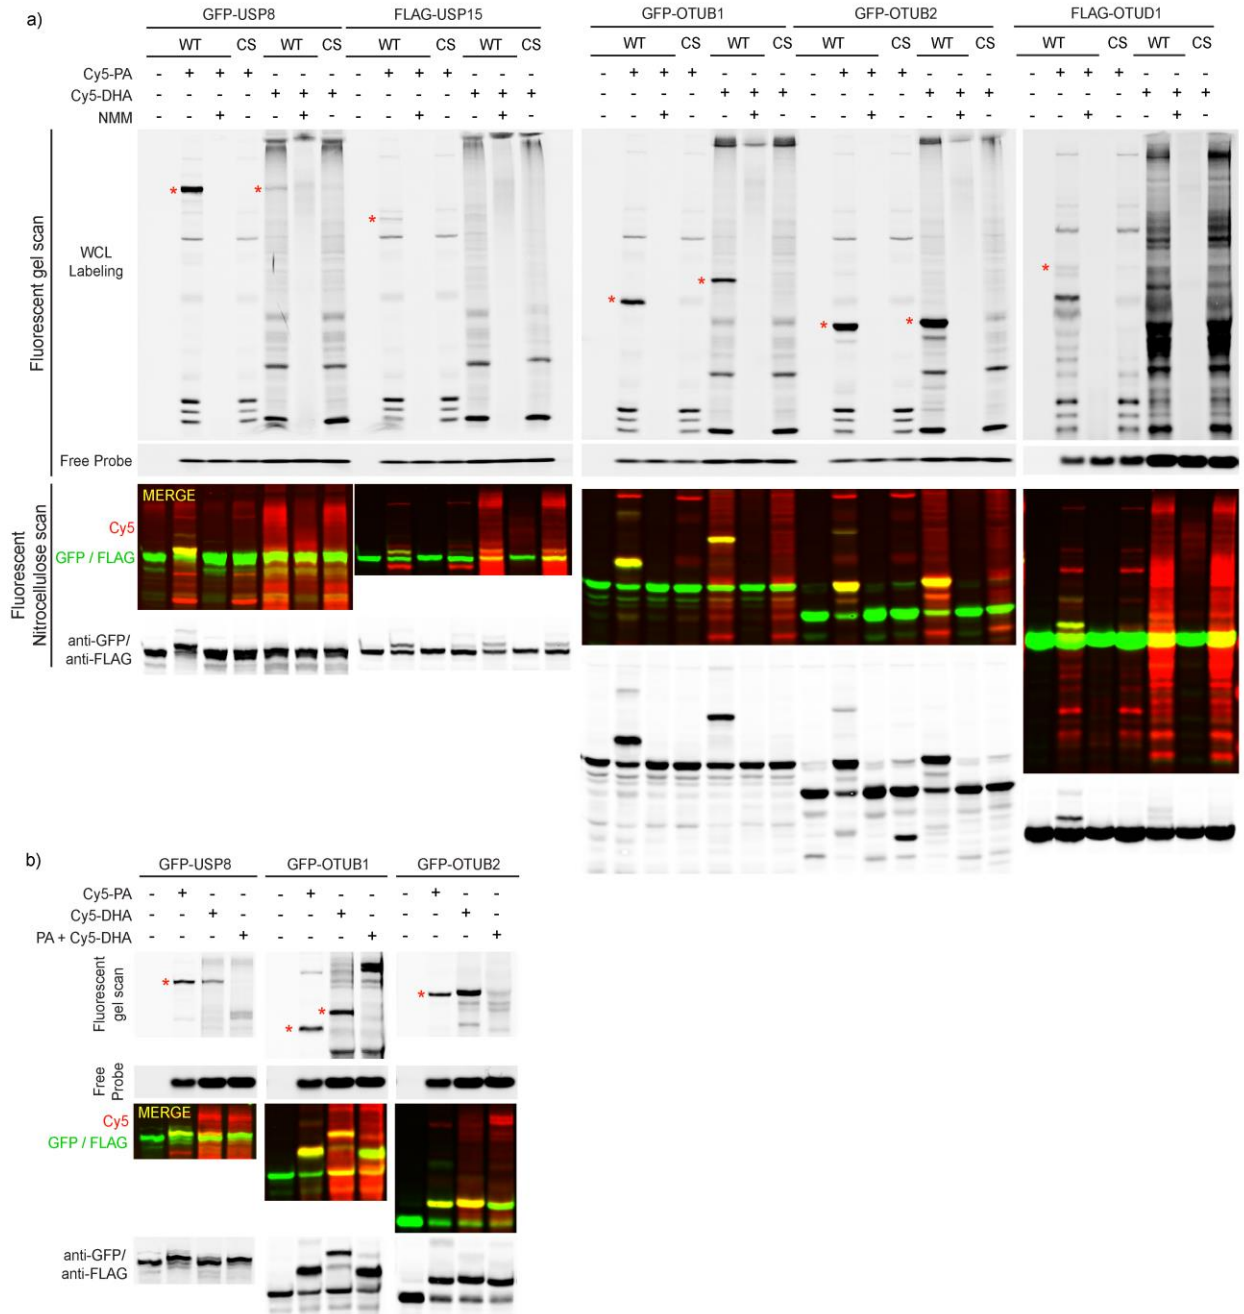

**Supplementary Figure 17.** DUB labeling: comparison of UbPA and UbDha. Labeling of DUBs in lysates of HEK293T cells transfected as indicated with Cy5-UbPA or Cy5-UbDha, visualized by fluorescence gel scan and immunoblotting against GFP or FLAG. **a)** Red asterisks indicate labeling of active DUBs. OTUB1 is doubly modified with UbDha, a known characteristic for OTUB1.<sup>3</sup> UbPA readily modifies all catalytically competent DUBs tested, while UbDha does not exhibit the same degree

of reactivity. Mutations of active-site cysteine residues to serines abolished DUB labeling. **b)** Labeling of DUBs with Cy5-UbDha was completely abolished upon pretreatment with UbPA.

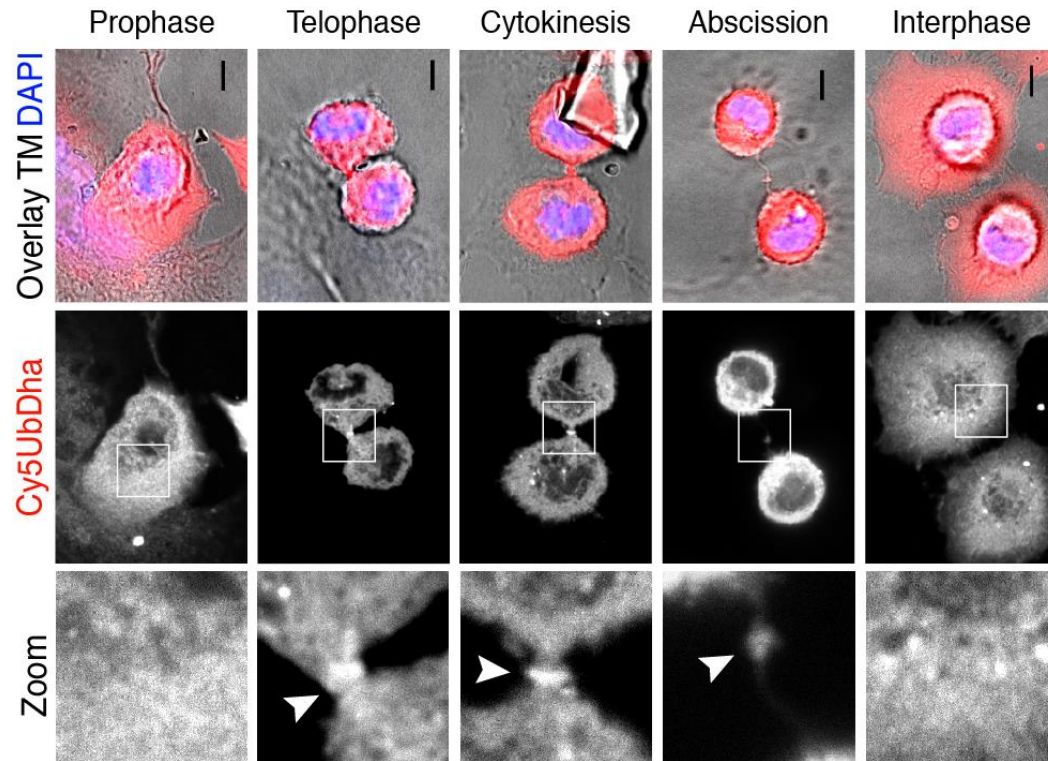

**Supplementary Figure 18.** Accumulation of Cy5-UbDha probe at the abscission site in diving cells. Cy5-UbDha probe (white, bottom panels) was introduced into HeLa cells by electroporation. Following 1 hr recovery period, cells were fixed and visualized by confocal microscopy. Representative images of cells harboring Cy5-UbDha undergoing various mitotic phases are shown; overlays correspond to Cy5 (red), nuclear DAPI (blue) and the transmission images; scale bars = 5  $\mu$ m. Arrows point towards the site of abscission, where applicable.

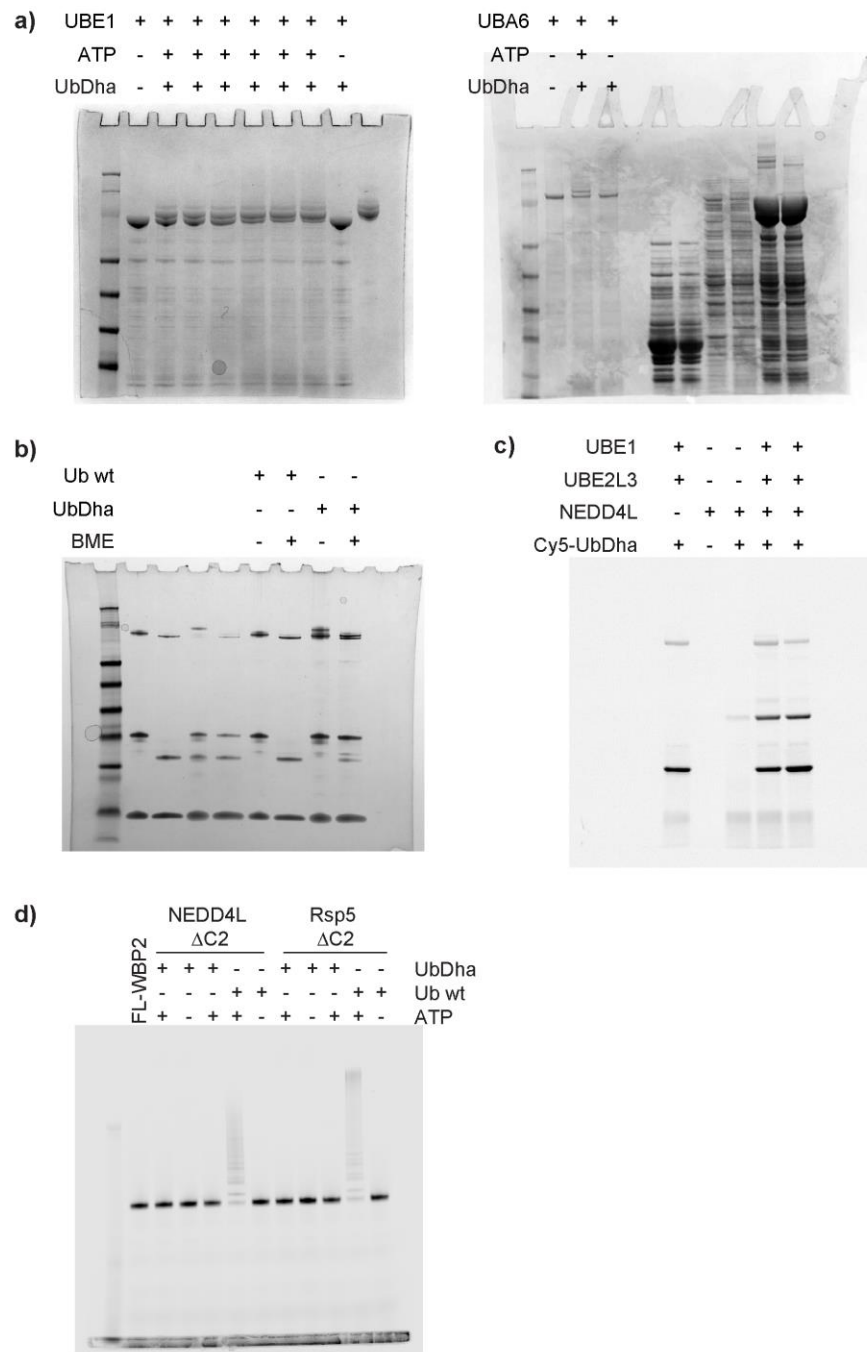

**Supplementary Figure 19.** Uncut gel images of Figure 2.

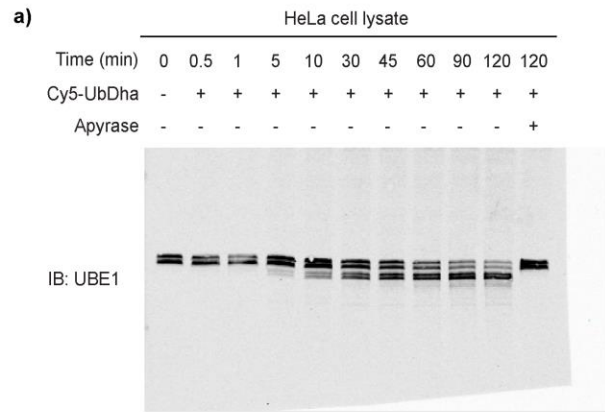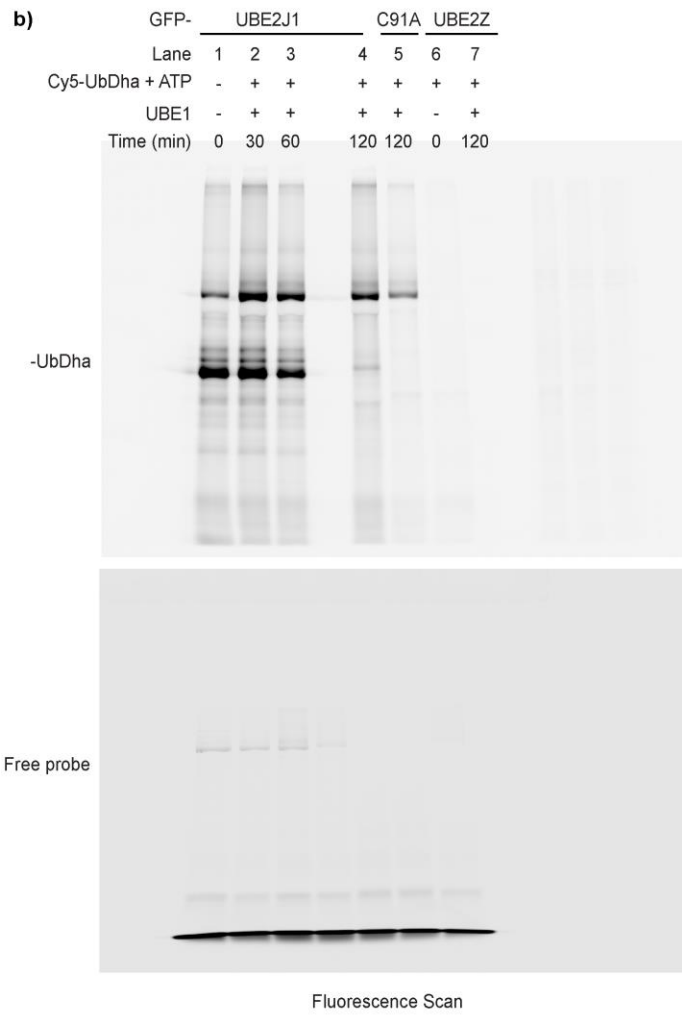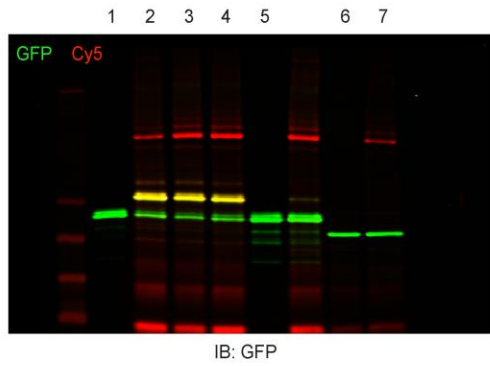

**Supplementary Figure 20.** Uncut gel images of Figure 4. **a)** Corresponds to Figure 4a, Full Fluorescence scan shown in Supplementary Figure 15; **b)** Corresponds to Figure 4c.

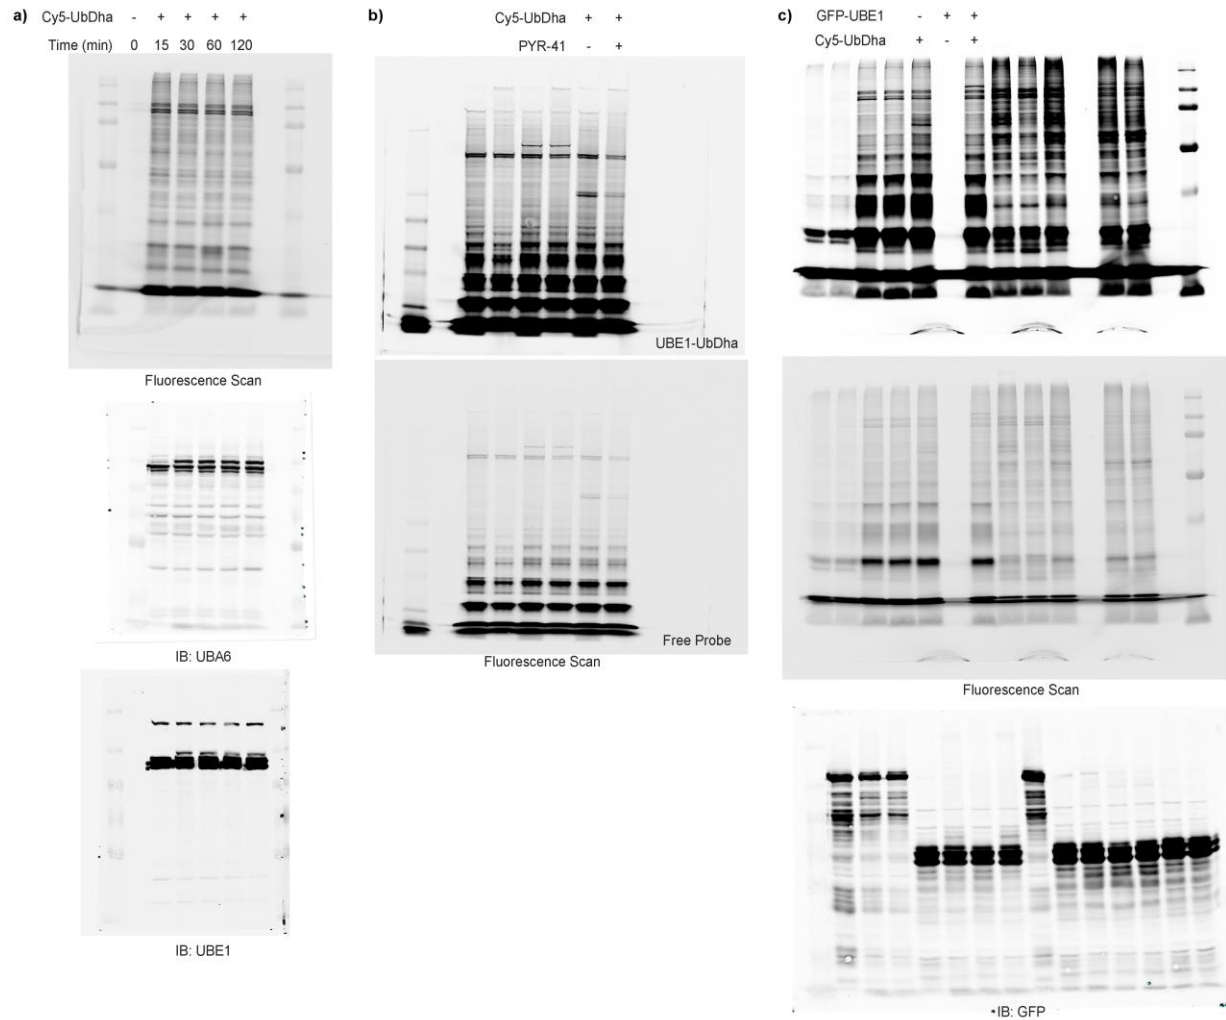

**Supplementary Figure 21.** Uncut gel images of Figure 5. **a)** Corresponds to Figure 5a; **b)** Corresponds to Figure 5b; **c)** Corresponds to Figure 5e.

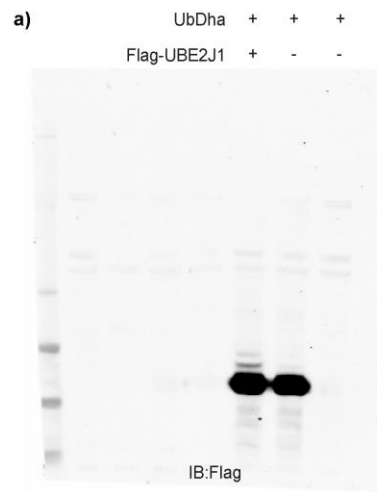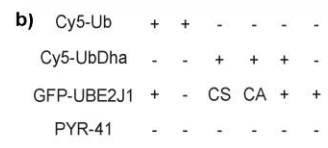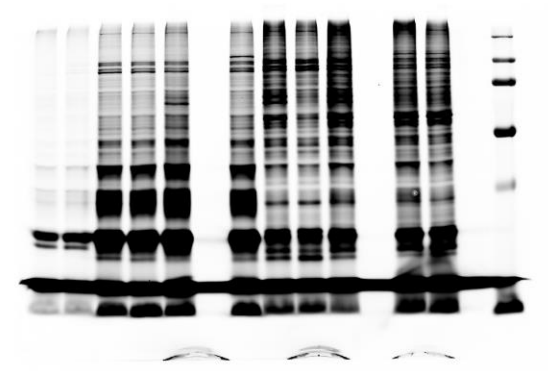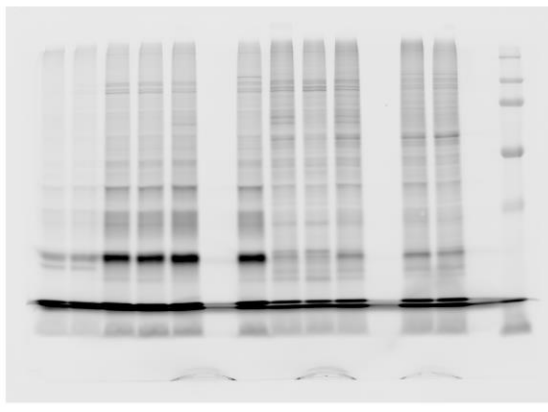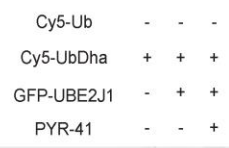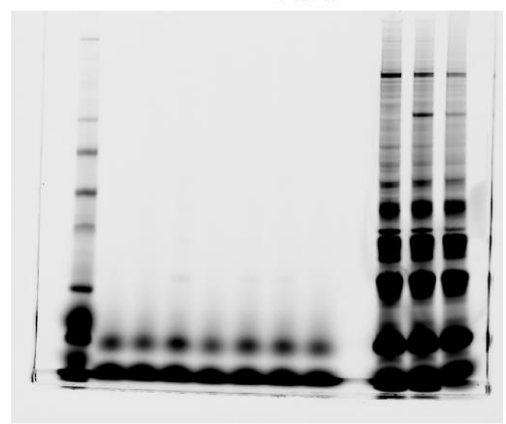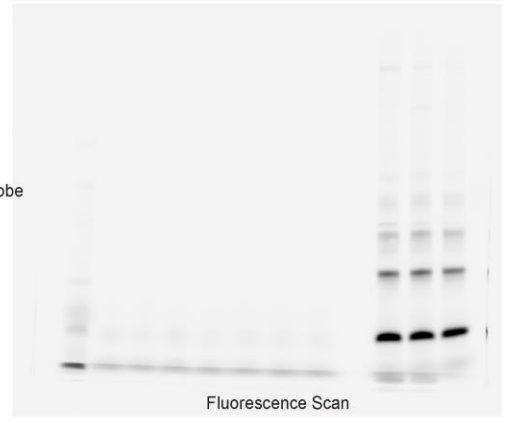

**Supplementary Figure 22.** Uncut gel images of Figure 6.



**Supplementary Table 1.** Data collection and refinement statistics

| UBE2D3-UbDha                                        |                            |
|-----------------------------------------------------|----------------------------|
| <b>Data collection</b>                              |                            |
| Space group                                         | P 1 21 1                   |
| Cell dimensions                                     |                            |
| <i>a</i> , <i>b</i> , <i>c</i> (Å)                  | 42.13, 52.27, 53.62        |
| $\alpha$ , $\beta$ , $\gamma$ (°)                   | 90, 100.78, 90             |
| Resolution (Å)                                      | 52.68 – 2.20 (2.28-2.20) * |
| <i>R</i> <sub>merge</sub>                           | 0.077 (0.76)               |
| <i>I</i> / $\sigma I$                               | 8.8 (2.0)                  |
| Completeness (%)                                    | 98.6 (99.6)                |
| Redundancy                                          | 3.5 (3.6)                  |
| <b>Refinement</b>                                   |                            |
| Resolution (Å)                                      | 52.68 – 2.20               |
| No. reflections                                     | 40492                      |
| <i>R</i> <sub>work</sub> / <i>R</i> <sub>free</sub> | 19.1 / 24.4                |
| No. atoms                                           |                            |
| Protein                                             | 1771                       |
| Ligand/ion                                          | 6                          |
| Water                                               | 77                         |
| <i>B</i> -factors                                   |                            |
| Protein                                             | 49.4                       |
| Ligand/ion                                          | 67.9                       |
| Water                                               | 46.9                       |
| R.m.s. deviations                                   |                            |
| Bond lengths (Å)                                    | 0.002                      |
| Bond angles (°)                                     | 0.58                       |

\*Highest-resolution shell is shown in parentheses.

## References

1. Huang, D.T. *et al.* Basis for a ubiquitin-like protein thioester switch toggling E1-E2 affinity. *Nature*. **445**, 394-398 (2007).
2. Olsen, S.K. & Lima, C.D. Structure of a ubiquitin E1-E2 complex: insights to E1-E2 thioester transfer. *Mol Cell*. **49**, 884-896 (2013).
3. Wang, T. *et al.* Evidence for bidentate substrate binding as the basis for the K48 linkage specificity of otubain 1. *J Mol Biol*. **386**, 1011-1023 (2009).
